# Supplementary material
Source: publisher figshare collection journal article supplement (https://aacr.figshare.com/articles/dataset/_/22528136)
Supplement: Supplementary file 1 [file 39991127]

## Supplementary Figure S1

A

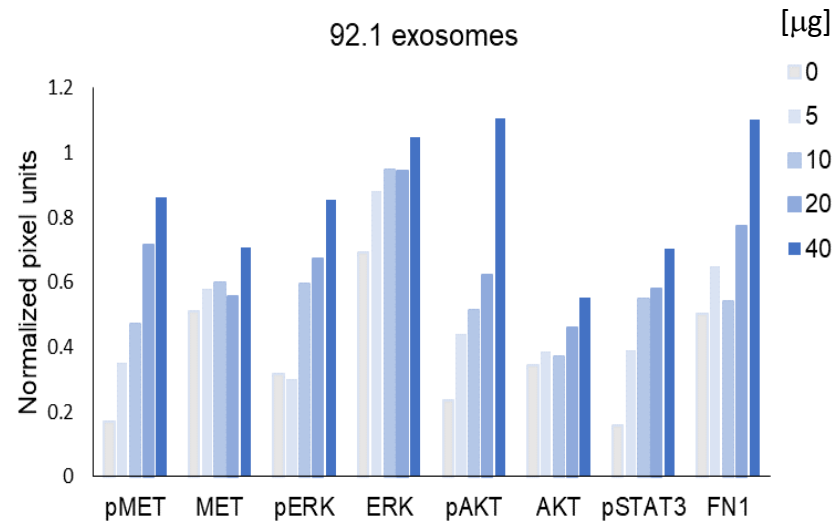

B

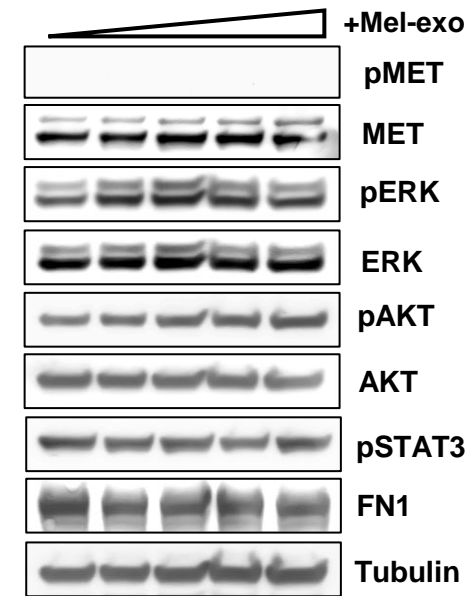

C

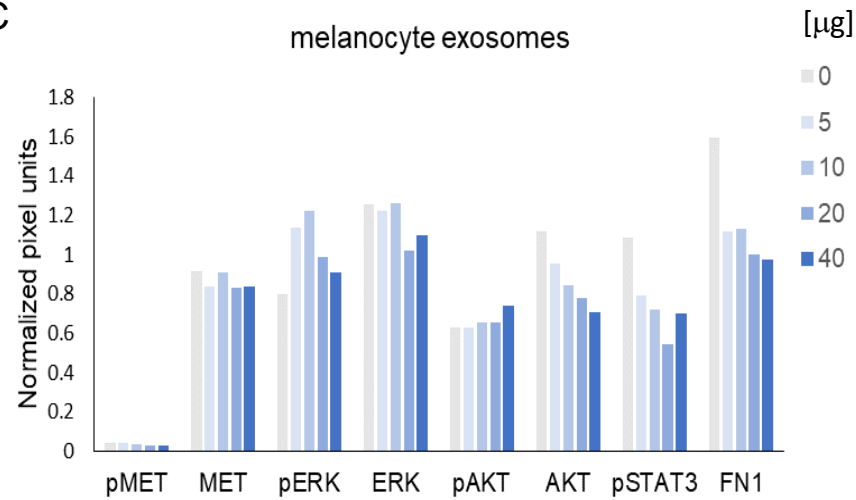

D

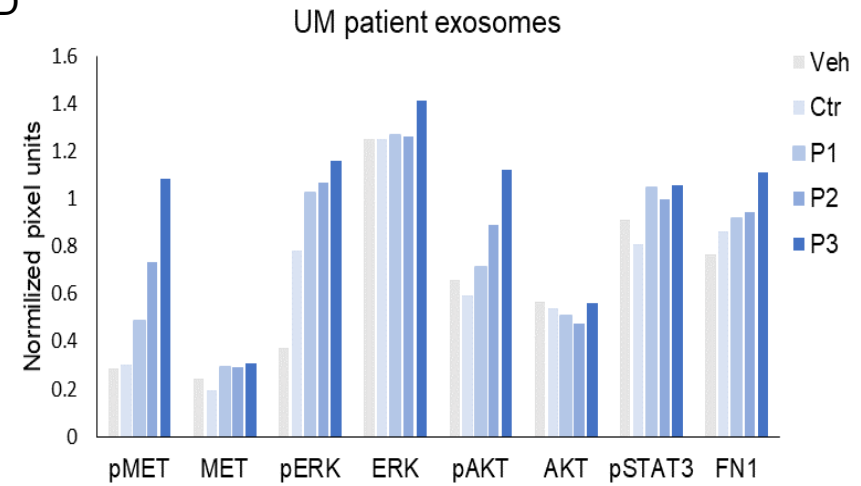

**Supplementary Fig. S1. A.** Densitometry analysis of Western blot shown in Fig. 2B. Each band was normalized to tubulin. **B.** Hepatocytes were treated with increasing doses of exosomes (0,5,10,20,40µg) isolated from melanocytes and analyzed by immunoblotting with the indicated antibodies and quantitated by densitometry (C). **D.** Densitometry analysis of Western blot shown in Fig. 2C.
